# Supplementary material for: In Candida albicans hyphae, Sec2p is physically associated with SEC2 mRNA on secretory vesicles
Source: PubMed Central journal article supplement (PMC4278529; doi:10.1111/mmi.12799), 2014-10-14
Supplement: mmi0094-0828-SD1.pdf [file mmi0094-0828-SD1.pdf]

**Table S1 Strains used in this study**

| Sheffield strain number | Relevant genotype                 | Full genotype                                                               | Source                 |
|-------------------------|-----------------------------------|-----------------------------------------------------------------------------|------------------------|
| 305                     | <i>BWP17</i>                      | <i>URA3::nim434/URA3::nim434his1::hisG/his1::hisG arg4::hisG/arg4::hisG</i> | (Wilson et al. 1999)   |
| 805                     | <i>SEC2 YFP</i>                   | <i>sec2::HIS1/SEC2 YFP::URA3</i>                                            | (Bishop et al. 2010)   |
| 835                     | <i>URA3-pMET3-YFP::SEC2/SEC2</i>  | <i>BWP17 URA3::pMET3YFP::SEC2/SEC2</i>                                      | (Bishop et al. 2010)   |
| 838                     | <i>SEC2-625 YFP</i>               | <i>sec2::HIS1/SEC2(1-625) YFP::URA3</i>                                     | (Bishop et al. 2010)   |
| 1049                    | <i>GIN4-GFP</i>                   | <i>BWP17 GIN4-GFP::URA3</i>                                                 | (Wightman et al. 2004) |
| 1051                    | <i>GIN4-3FLAG</i>                 | <i>GIN4/ GIN4-3xFLAG::URA3</i>                                              | This study             |
| 1154                    | <i>pMet3-YFP-sec2-S584E/sec2Δ</i> | <i>BWP17 URA3-pMet3-YFP-sec2-S584E-ARG4/sec2::HIS1</i>                      | (Bishop et al. 2010)   |
| 1156                    | <i>pMet3-YFP-SEC2-S645E/sec2Δ</i> | <i>BWP17 URA3::Met3-YFP-Sec2-S645E::ARG4/sec2::HIS1</i>                     | (Bishop et al. 2010)   |
| 1164                    | <i>pMet3-YFP-SEC2-S645A/sec2Δ</i> | <i>BWP17 URA3::pMet3-YFP-Sec2-S645A::ARG4/sec2::HIS1</i>                    | (Bishop et al. 2010)   |
| 1329                    | <i>ARF1 GFP</i>                   | <i>ARF1/ARF1 GFP ARG4</i>                                                   | This Study             |
| 1331                    | <i>ARF1 GFP/SEC2 HA</i>           | <i>sec2::HIS1/SEC2 HA::URA, ARF1/ARF1 GFP ARG4</i>                          | This Study             |
| 1365                    | <i>SEC2 3xFLAG</i>                | <i>sec2::HIS1/SEC2 3FLAG::URA3</i>                                          | This Study             |
|                         |                                   |                                                                             |                        |

**Table S2 Primers used in this study**

| PRIMER         | Nucleotide sequence (5' → 3')                                                                                                                                  |
|----------------|----------------------------------------------------------------------------------------------------------------------------------------------------------------|
| S1 SEC 3xFLAG  | ATTTAAAGATCAATTAATAAAGAATTAGATCAAACCTTTAGAGATGTTAGCCGAAAATAT<br>TGATTTTGATGAGAGTAGTAATGGTAATGGTAATGGTATATGGACTACAAAGACCATGA<br><b>CGGT</b>                     |
| S1 SEC2 HA     | ATTTAAAGATCAATTAATAAAGAATTAGATCAAACCTTTAGAGATGTTAGCCGAAAATAT<br>TGATTTTGATGAGAGTAGTAATGGTAATGGTAATGGTATATGGT <b>CGACGGATCCCCGGGT</b><br><b>A</b>               |
| S2 SEC2        | TAACGACAGCAATGGGCCAGAAAATCCCGTCAAAAAAAAAATCCACAATACGCGTAATG<br>CACTCTAGAATTCGTAAATGATTCATTCATAATTAACAAATCTGATATCATCGATGAATT<br><b>CGAGTCGATGAATTCGAGCTCGTT</b> |
| S1 ARF1 XFP    | TCCAAGCTACTTGTGCCACTACTGGGGATGGTTTATACGAAGGTTTGAATGGTTATCTA<br>CTAACTTGAAAACTCTTCAGGT <b>GCTGGCGCAGGTGCTTC</b>                                                 |
| S2 ARF1 XFP    | TCCACCAGTAAAATAATAAAGATAAGAGGTGAAGTGGTGAAGTGGTGAAGTGGGA<br>ACAATATTAGAGAGGGAAAACATCTGATATCATCGATGAATTC <b>GAG</b>                                              |
| S1 GIN4 3xFLAG | TAAAGTTACAACCTGATACTTTATTTCTGAAATTGAAAAGGTCTTACTCAAAGAAGGTGTT<br>TTAGATAAAATGGACTACAAAGACCATGACGGTG                                                            |
| S2 GIN4 3xFLAG | TGCTTTTATTAGCATGTTTACTCAATGGGGGGTTGGAAGCTTACTGATACTGTTGGACCT<br>ACTTATATATCGATGAATTCGAGCTCGTT                                                                  |
| G1-SEC2        | CTGAACCCGTACAAGAACCAG                                                                                                                                          |

|                |                                |
|----------------|--------------------------------|
| G1-ARF1        | GGGATGTCGGTGGTCAAGAT           |
| 3xFLAG-R       | GGCCGCAAGCTTGTTCATCGT          |
| URA3-F         | GGAAGAGATCCAGATATTGAAGG        |
| URA3-R         | TGTGCTACTGGTGAGGCATG           |
| ARG4-F         | CTGCTAAAAGTGCCGTTTTAAAACAATT   |
| ARG4-R         | ACCGGTGAAACGACCACCCC           |
| HIS1-F         | GGACGAATTGAAGAAAGCTGGTGCAACCG  |
| HIS1-R         | GGGATATCAGCTGCAGGCAAGAAGATTAAT |
| YFP-R          | GGATAAGGCAGATTGGTAGG           |
| pCaHA-3        | TTAACCGGCATAGTCTGGGA           |
| Sec2-R157-Flc  | GTTCTGCATCTGAATCCTCT           |
| Sec2-R541-Flc  | GGCTACGTATATCTCCTTGT           |
| Sec2-R800-Flc  | AGCAGACGATGAAGATACCG           |
| Sec2-R1043-Flc | CGAGGCAATTACATGAGTGT           |
| Sec2-R1091-Flc | GTCAGATTGTTGCCACTGT            |
| Sec2-1284-Flc  | CCAGAGGCATTGTTACCCTT           |
| Sec2-R1417-Flc | TGGTAGCAGGTAAGAAGGG            |
| Sec2-R1715-Flc | ATTGGTATGAATGCTATTGG           |
| Sec2-R1958-Flc | GGCTTCATCAAATAACGAGG           |
| Sec2-R1941-Flc | TTGCTAACCATGGTGTGGC            |
| ADE2-F1        | AAGGAATCTCCATTGGTGGG           |
| ADE2-R1        | GGCCGCCACCATACCTGGCA           |
| ACT1-F         | GGCCGCCACCATACCTGGCA           |
| ACT1-R         | AGCAATACCTGGGAACATGG           |
| SEC2-F1        | CCTAAACCAACCCAACAACAA          |
| SEC2-R1        | TTCTGCTGATGCTGTTTCTGA          |
| 1486-F2        | GCCATCATTGGTGTACCTT            |
| 1486-R1        | TGATTTGGTGGTATTGGTGGT          |
| 4055-F1        | CTGCCCTAGCCAGGGTTAAT           |
| 4055-R1        | GCAAATACTGCAACGACCAA           |
| 5693-F1        | AGCCCTTCCATTGACATTTG           |
| 5693-R1        | ACCACCCCAAAACAACGATA           |
| 7350-F1        | TATCTACTGTCGCCGGTGGT           |
| 7350-R1        | CCACCATATTGTTGCTCGTG           |
| 7490-F2        | ATCAAACGTCAGGCATTGGT           |
| 7490-R1        | TGCATAACCAATATCCATACTCCA       |

## References

- Bishop, A., Lane, R., Beniston, R., Lazo, B., Smythe, C., and Sudbery, P. 2010. Hyphal growth in *Candida albicans* requires the phosphorylation of Sec2 by the Cdc28-Ccn1/Hgc1 kinase. *EMBO J.* **29**:2930-2942.
- Wightman, R, Bates, S, Amnorrattapan, P, and Sudbery, P. E. 2004. In *Candida albicans*, the Nim1 kinases Gin4 and Hsl1 negatively regulate pseudohypha formation and Gin4 also controls septin organization. *J Cell Biol.* **164**:581-591.

Wilson, B, Davis, D, and Mitchell, A. P.1999. Rapid hypothesis testing in *Candida albicans* through gene disruption with short homology regions. *J Bacteriol.***181**:1868-1874.
